# Supplementary material for: Decoration of Pt on Cu/Co double-doped CeO2 nanospheres and their greatly enhanced catalytic activity
Source: PubMed Central journal article supplement (PMC5965059; doi:10.1039/c5sc04069h), 2015-11-25
Supplement: SC-007-C5SC04069H-s001.pdf [file SC-007-C5SC04069H-s001.pdf]

## Supporting Information

### **Decoration of Pt on Cu/Co Double-Doped CeO<sub>2</sub> Nanospheres and Their Greatly Enhanced Catalytic Activity**

Fan Wang,<sup>[b]</sup> Wang Li,<sup>[a]</sup> Xilan Feng,<sup>[a]</sup> Dapeng Liu,<sup>\*[a]</sup> and Yu Zhang<sup>\*[a]</sup>

*a) Key Laboratory of Bio-Inspired Smart Interfacial Science and Technology of Ministry of Education, School of Chemistry and Environment, Beihang University, Beijing 100191, P.R. China*

*b) State Key Laboratory of Rare Earth Resource Utilization, Changchun Institute of Applied Chemistry, Chinese Academy of Sciences, Changchun, 130022 Jilin, China.*

| Sample            | CeO <sub>2</sub> | Cu-CeO <sub>2</sub> | Cu <sub>0.66</sub> Co <sub>0.34</sub> -CeO <sub>2</sub> | Cu <sub>0.50</sub> Co <sub>0.50</sub> -CeO <sub>2</sub> | Cu <sub>0.34</sub> Co <sub>0.66</sub> -CeO <sub>2</sub> | Co-CeO <sub>2</sub> |
|-------------------|------------------|---------------------|---------------------------------------------------------|---------------------------------------------------------|---------------------------------------------------------|---------------------|
| Average Size (nm) | 174.03           | 68.53               | 100.37                                                  | 207.9                                                   | 224.37                                                  | 194.9               |

**Table S1.** Average size of Cu<sub>x</sub>Co<sub>1-x</sub>-CeO<sub>2</sub> and pure CeO<sub>2</sub> nanospheres.

| Sample            | CeO <sub>2</sub> -Pt | Cu-CeO <sub>2</sub> -Pt | Cu <sub>0.66</sub> Co <sub>0.34</sub> -CeO <sub>2</sub> -Pt | Cu <sub>0.50</sub> Co <sub>0.50</sub> -CeO <sub>2</sub> -Pt | Cu <sub>0.34</sub> Co <sub>0.66</sub> -CeO <sub>2</sub> -Pt | Co-CeO <sub>2</sub> -Pt |
|-------------------|----------------------|-------------------------|-------------------------------------------------------------|-------------------------------------------------------------|-------------------------------------------------------------|-------------------------|
| Average Size (nm) | 181.22               | 65.02                   | 114.31                                                      | 181.59                                                      | 205.33                                                      | 177.29                  |

**Table S2.** Average size of Cu<sub>x</sub>Co<sub>1-x</sub>-CeO<sub>2</sub>-Pt and CeO<sub>2</sub>-Pt nanospheres.

| Sample                                    | CeO <sub>2</sub> -Pt | Cu-CeO <sub>2</sub> -Pt | Cu <sub>0.66</sub> Co <sub>0.34</sub> -CeO <sub>2</sub> -Pt | Cu <sub>0.50</sub> Co <sub>0.50</sub> -CeO <sub>2</sub> -Pt | Cu <sub>0.34</sub> Co <sub>0.66</sub> -CeO <sub>2</sub> -Pt | Co-CeO <sub>2</sub> -Pt |
|-------------------------------------------|----------------------|-------------------------|-------------------------------------------------------------|-------------------------------------------------------------|-------------------------------------------------------------|-------------------------|
| Lattice spacing<br>CeO <sub>2</sub> (111) | 0.300 nm             | 0.324 nm                | 0.317 nm                                                    | 0.303 nm                                                    | 0.321 nm                                                    | 0.316 nm                |
| Lattice spacing<br>Pt (200)               | 0.192 nm             | 0.196 nm                | 0.194 nm                                                    | 0.195 nm                                                    | 0.194 nm                                                    | 0.195 nm                |

**Table S3.** Lattice spacing of Cu<sub>x</sub>Co<sub>1-x</sub>-CeO<sub>2</sub>-Pt and CeO<sub>2</sub>-Pt nanospheres.

| Sample                                                       | Co (mg/kg) | Cu (mg/kg) | Pt (mg/kg) | Ce (mg/kg) | Pt (mol%) | Cu (mol%) | Co (mol%) | Ce (mol%) | Cu/Co in molar ratio |
|--------------------------------------------------------------|------------|------------|------------|------------|-----------|-----------|-----------|-----------|----------------------|
| <b>Cu-CeO<sub>2</sub>-Pt</b>                                 | —          | 3066       | 6535       | 467600     | 1.0       | 1.4       | —         | 97.6      | —                    |
| <b>Cu<sub>0.66</sub>Co<sub>0.34</sub>-CeO<sub>2</sub>-Pt</b> | 1895       | 4777       | 14120      | 773800     | 1.3       | 1.3       | 0.6       | 96.8      | 2.3                  |
| <b>Cu<sub>0.50</sub>Co<sub>0.50</sub>-CeO<sub>2</sub>-Pt</b> | 2883       | 4357       | 14080      | 767000     | 1.3       | 1.2       | 0.9       | 96.6      | 1.4                  |
| <b>Cu<sub>0.34</sub>Co<sub>0.66</sub>-CeO<sub>2</sub>-Pt</b> | 3628       | 2550       | 16080      | 822800     | 1.4       | 0.7       | 1.0       | 97.0      | 0.6                  |
| <b>Co-CeO<sub>2</sub>-Pt</b>                                 | 7217       | —          | 39950      | 647300     | 4.1       | —         | 2.5       | 93.4      | —                    |
| <b>CeO<sub>2</sub>-Pt</b>                                    | —          | —          | 40770      | 577600     | 4.8       | —         | —         | 95.2      | —                    |

**Table S4.** ICP-MS analyses of CeO<sub>2</sub>-Pt and Cu<sub>x</sub>Co<sub>1-x</sub>-CeO<sub>2</sub>-Pt nanospheres.
